# Supplementary material for: Mental Pain in Eating Disorders: An Exploratory Controlled Study
Source: MDPI journal article supplement (doi:10.3390/jcm10163584), 2021-08-14
Supplement: s1 [file s1]

**Table S1.** Correlations between MPQ- mental pain, CID-20-mental pain item, EAT-40 and BDI-II and the CID-20-depression items in ED patients.

|                                                        | <b>Mental Pain<br/>Questionnaire</b> | <b>CASMP</b>  |
|--------------------------------------------------------|--------------------------------------|---------------|
| <b>ED and Depressive Symptomatology Questionnaires</b> |                                      |               |
|                                                        | <i>r (p)</i>                         | <i>r (p)</i>  |
| <b>EAT- Oral Control</b>                               | .191 (.121)                          | .207 (.095)   |
| <b>EAT-Bulimia and food preoccupations</b>             | .234 (.057)                          | .329 (.007)   |
| <b>EAT- Dieting</b>                                    | .199 (.107)                          | .178 (.179)   |
| <b>BDI-II Somatic Affect symptoms</b>                  | .593 (1.21)                          | .340 (.005)   |
| <b>BDI-II Cognitive symptoms</b>                       | .587 (2.77)                          | .308 (.013)   |
| <b>Clinical Interview for Depression Items</b>         |                                      |               |
| <b>CID-20-Depressed mood</b>                           | .341 (.004)                          | .400 (.001)   |
| <b>CID-20-Guilt</b>                                    | .302 (.012)                          | .081 (.509)   |
| <b>CID-20-Pessimism</b>                                | .255 (.034)                          | .108 (.375)   |
| <b>CID-20-Suicidal tendencies</b>                      | .493 (<0.001)                        | .292 (.015)   |
| <b>CID-20-Work and interests</b>                       | .262 (.030)                          | .290 (.016)   |
| <b>CID-20-Energy and fatigue</b>                       | .186 (.125)                          | .256 (.034)   |
| <b>CID-20-General anxiety</b>                          | .297 (.013)                          | .460 (<0.001) |
| <b>CID-20-Phobic anxiety</b>                           | .208 (.087)                          | .079 (.521)   |
| <b>CID-20-Avoidance</b>                                | .255 (.035)                          | .064 (.601)   |
| <b>CID-20-Somatic anxiety</b>                          | .332 (.005)                          | .407 (.001)   |
| <b>CID-20-Irritability</b>                             | .130 (.286)                          | -.008 (.946)  |
| <b>CID-20-Early insomnia</b>                           | .276 (.022)                          | .403 (.001)   |
| <b>CID-20-Delayed insomnia</b>                         | .092 (.450)                          | .323 (.007)   |
| <b>CID-20-Depressed appearance</b>                     | .281 (.019)                          | .092 (.452)   |
| <b>CID-20-Environmental Reactivity</b>                 | -.145 (.234)                         | -.352 (.003)  |

Abbreviations: BDI-II, Beck Depression Inventory II; CASMP, Clinical assessment for mental pain; CID-20, Clinical Interview for Depression-20 items; EAT-40, Eating Attitude Test-40.

**Table S2.** MANOVAs comparing ED patients with comorbid mental pain and ED patients without mental pain in EAT-40, BDI-II and CID-20 scores.

| <b>Multivariate Tests</b>                           |                                                                         |                                                                        |               |          |
|-----------------------------------------------------|-------------------------------------------------------------------------|------------------------------------------------------------------------|---------------|----------|
|                                                     | $\lambda$                                                               | df                                                                     | F(p)          | $\eta^2$ |
| <b>EAT-40 Scales</b>                                | .859                                                                    | 3.6                                                                    | 3.058 (.036)  | .141     |
| <b>BDI-II</b>                                       | .851                                                                    | 2.00                                                                   | 4.88(.011)    | .149     |
| <b>CID-20 Scales</b>                                | .463                                                                    | 15.46                                                                  | 3.556 (.004)  | .537     |
| <b>Univariate Tests</b>                             |                                                                         |                                                                        |               |          |
|                                                     | <b>Mental Pain<br/>Presence<br/>(N=31)<br/>Mean <math>\pm</math> SD</b> | <b>Mental Pain<br/>Absence<br/>(N=40)<br/>Mean <math>\pm</math> SD</b> | F(p)          | $\eta^2$ |
| <b>EAT-Oral Control</b>                             | 12.52 $\pm$ 7.57                                                        | 9.21 $\pm$ 9.46                                                        | .906 (.345)   | .015     |
| <b>EAT -Bulimia and<br/>food<br/>preoccupations</b> | 12.45 $\pm$ 6.46                                                        | 8.03 $\pm$ 6.76                                                        | 5.801 (.019)  | .091     |
| <b>EAT -Dieting</b>                                 | 25.76 $\pm$ 16.29                                                       | 21.03 $\pm$ 16.60                                                      | .846 (.362)   | .014     |
| <b>BDI-II Somatic</b>                               | 17.46 $\pm$ 6.07                                                        | 11.79 $\pm$ 6.91                                                       | 9.91 (.003)   | .148     |
| <b>BDI-II Cognitive</b>                             | 11.93 $\pm$ 4.64                                                        | 8.00 $\pm$ 6.16                                                        | 6.21 (.016)   | .098     |
| <b>CID-20-Depressed<br/>mood</b>                    | 4.31 $\pm$ 1.36                                                         | 3.06 $\pm$ 1.45                                                        | 10.713 (.002) | .151     |
| <b>CID-20-Guilt</b>                                 | 3.59 $\pm$ 1.08                                                         | 3.39 $\pm$ 1.27                                                        | .494 (.485)   | .008     |
| <b>CID-20-Pessimism</b>                             | 3.10 $\pm$ 1.56                                                         | 2.83 $\pm$ 1.64                                                        | .445 (.507)   | .007     |
| <b>CID-20-Suicidal<br/>tendencies</b>               | 2.69 $\pm$ 1.25                                                         | 1.83 $\pm$ 1.23                                                        | 7.335 (.009)  | .109     |
| <b>CID-20-Work and<br/>interests</b>                | 4.00 $\pm$ 1.60                                                         | 2.61 $\pm$ 1.87                                                        | 7.891 (.007)  | .116     |

|                                        |             |             |                         |      |
|----------------------------------------|-------------|-------------|-------------------------|------|
| <b>CID-20-Energy and fatigue</b>       | 3.93 ± 1.58 | 3.06 ± 1.65 | 4.304 (.042)            | .067 |
| <b>CID-20-General anxiety</b>          | 4.21 ± 1.52 | 2.64 ± 1.37 | 17.630 ( <b>.0001</b> ) | .227 |
| <b>CID-20-Phobic anxiety</b>           | 2.31 ± 1.71 | 2.36 ± 1.74 | .073 (.788)             | .001 |
| <b>CID-20-Avoidance</b>                | 2.10 ± 1.80 | 2.39 ± 1.97 | .401 (.529)             | .007 |
| <b>CID-20-Somatic anxiety</b>          | 3.55 ± 1.68 | 2.39 ± 1.46 | 9.080 (.004)            | .131 |
| <b>CID-20-Irritability</b>             | 2.34 ± 1.20 | 2.25 ± 1.36 | .025 (.874)             | .000 |
| <b>CID-20-Early insomnia</b>           | 2.55 ± 1.68 | 1.56 ± 1.05 | 10.216 ( <b>.002</b> )  | .145 |
| <b>CID-20-Delayed insomnia</b>         | 2.97 ± 1.61 | 2.03 ± 1.55 | 4.865 (.031)            | .075 |
| <b>CID-20-Depressed appearance</b>     | 2.21 ± 1.29 | 1.81 ± 1.14 | 1.130 (.292)            | .018 |
| <b>CID-20-Environmental Reactivity</b> | 3.66 ± 1.63 | 4.61 ± 1.35 | 6.991 (.010)            | .104 |

Notes: Comparisons adjusted for age, BMI, and illness duration; statistical significance in bold.

After Bonferroni corrections p values were set at 0.017 for EAT-40 subscales, 0.025 for BDI-II subscales, and 0.003 for CID-20 subscales.

Abbreviations: BDI-II, Beck Depression Inventory II; CID-20, Clinical Interview for Depression-20 items; EAT-40, Eating Attitude Test-40; M, mean; SD, standard deviation.
